# Supplementary material for: Coordination chemistry of 2,2′-biphenylenedithiophosphinate and diphenyldithiophosphinate with U, Np, and Pu
Source: Royal Society of Chemistry journal article supplement (doi:10.1039/c5dt02976g), 2015-01-01
Supplement: c5dt02976g1.pdf [file c5dt02976g1.pdf]

## Electronic Supporting Information for

# **COORDINATION CHEMISTRY OF 2,2'- BIPHENYLENEDITHIOPHOSPHINATE AND DIPHENYLDITHIOPHOSPHINATE WITH U, Np, and Pu.**

Joseph A. Macor,<sup>1,2</sup> Jessie L. Brown,<sup>1</sup> Justin N. Cross,<sup>1</sup> Scott R. Daly,<sup>1,3</sup> Andrew J. Gaunt,<sup>1\*</sup>  
Gregory S. Girolami,<sup>2\*</sup> Michael T. Janicke,<sup>1</sup> Stosh A. Kozimor,<sup>1\*</sup> Mary P. Neu,<sup>1</sup> Angela C.  
Olson,<sup>1</sup> Sean D. Reilly,<sup>1</sup> and Brian L. Scott.<sup>1</sup>

<sup>1</sup> *Los Alamos National Laboratory, Los Alamos, New Mexico 87545*

<sup>2</sup> *University of Illinois at Urbana-Champaign, Urbana, Illinois 61801*

<sup>3</sup> *The University of Iowa, Iowa City, Iowa 52242-1294*

\* To whom correspondence should be addressed, [gaunt@lanl.gov](mailto:gaunt@lanl.gov), [ggirolam@illinois.edu](mailto:ggirolam@illinois.edu),  
[stosh@lanl.gov](mailto:stosh@lanl.gov);

---

### **Table of Contents**

|                                                                                                                                            |     |
|--------------------------------------------------------------------------------------------------------------------------------------------|-----|
| 1. Thermal Ellipsoid Plot of U[S <sub>2</sub> P(C <sub>6</sub> H <sub>5</sub> ) <sub>2</sub> ] <sub>4</sub>                                | S3  |
| 2. Thermal Ellipsoid Plot of U[S <sub>2</sub> P( <sup>t</sup> Bu <sub>2</sub> C <sub>12</sub> H <sub>6</sub> ) <sub>2</sub> ] <sub>4</sub> | S4  |
| 3. <sup>1</sup> H NMR spectrum of HS <sub>2</sub> P(C <sub>12</sub> H <sub>8</sub> ).                                                      | S5  |
| 4. <sup>31</sup> P NMR spectrum of HS <sub>2</sub> P(C <sub>12</sub> H <sub>8</sub> ).                                                     | S6  |
| 5. <sup>1</sup> H NMR spectrum of HS <sub>2</sub> P( <sup>t</sup> Bu <sub>2</sub> C <sub>12</sub> H <sub>6</sub> ).                        | S7  |
| 6. <sup>31</sup> P NMR spectrum of HS <sub>2</sub> P( <sup>t</sup> Bu <sub>2</sub> C <sub>12</sub> H <sub>6</sub> ).                       | S8  |
| 7. <sup>1</sup> H NMR Spectra of K[S <sub>2</sub> P( <sup>t</sup> Bu <sub>2</sub> C <sub>12</sub> H <sub>6</sub> )]                        | S9  |
| 8. <sup>31</sup> P NMR spectrum of K[S <sub>2</sub> P( <sup>t</sup> Bu <sub>2</sub> C <sub>12</sub> H <sub>6</sub> )].                     | S10 |
| 9. <sup>1</sup> H NMR spectrum of U[S <sub>2</sub> P(C <sub>6</sub> H <sub>5</sub> ) <sub>2</sub> ] <sub>4</sub> .                         | S11 |
| 10. <sup>31</sup> P NMR spectrum of U[S <sub>2</sub> P(C <sub>6</sub> H <sub>5</sub> ) <sub>2</sub> ] <sub>4</sub> .                       | S12 |
| 11. IR spectrum of U[S <sub>2</sub> P(C <sub>6</sub> H <sub>5</sub> ) <sub>2</sub> ] <sub>4</sub> .                                        | S13 |

|                                                                                                                                                               |     |
|---------------------------------------------------------------------------------------------------------------------------------------------------------------|-----|
| 12. Electronic absorption spectrum of $U[S_2P(C_6H_5)_2]_4$ .                                                                                                 | S14 |
| 13. $^1H$ NMR spectrum of $U[S_2P('Bu_2C_{12}H_6)]_4$ .                                                                                                       | S15 |
| 14. $^{31}P$ NMR spectrum of $U[S_2P('Bu_2C_{12}H_6)]_4$ .                                                                                                    | S16 |
| 15. $^1H$ NMR spectrum of $Np[S_2P(C_6H_5)_2]_4$ .                                                                                                            | S17 |
| 16. $^{31}P$ NMR spectrum of $Np[S_2P(C_6H_5)_2]_4$ .                                                                                                         | S18 |
| 17. Vis/NIR diffuse reflectance solid-state spectrum of crystalline<br>$Np[S_2P(C_6H_5)_2]_4$ vs. solution phase spectrum of $Np[S_2P(C_6H_5)_2]_4$ .         | S19 |
| 18. $^1H$ NMR spectrum of $Np[S_2P('Bu_2C_{12}H_6)]_4$ .                                                                                                      | S20 |
| 19. $^{31}P$ NMR spectrum of $Np[S_2P('Bu_2C_{12}H_6)]_4$ .                                                                                                   | S21 |
| 20. Vis/NIR diffuse reflectance solid-state spectrum of crystalline<br>$Np[S_2P('BuC_{12}H_8)]_4$ vs. solution phase spectrum of $Np[S_2P('BuC_{12}H_8)]_4$ . | S22 |
| 21. Bond Distances for $[PPh_4][S_2P(C_{12}H_8)]$ and $[AsPh_4][S_2P('Bu_2C_{12}H_6)]$                                                                        | S23 |
| 22. Bond Distances for $U[S_2P(C_6H_5)]_4$ , $Np[S_2P(C_6H_5)]_4$ ,<br>and $Pu[S_2P(C_6H_5)]_3(NC_5H_5)_2$                                                    | S24 |
| 23. Bond Distances for $U[S_2P('Bu_2C_{12}H_6)]_4$ , and $Np[S_2P('Bu_2C_{12}H_6)]_4$                                                                         | S27 |

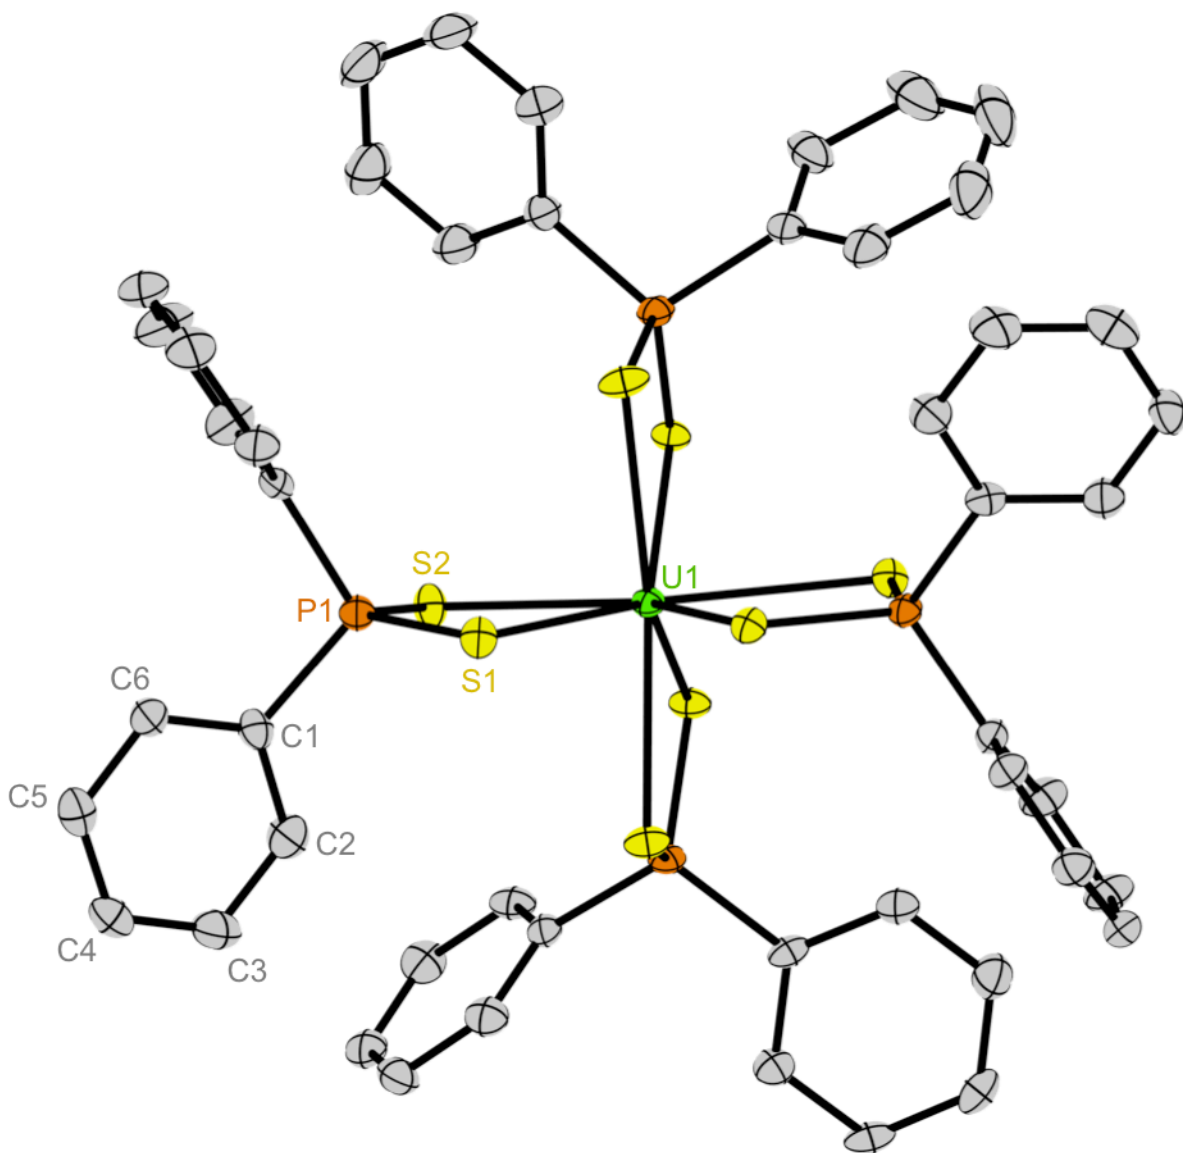

**Figure S1:** Molecular structure of  $\text{U}[\text{S}_2\text{P}(\text{C}_6\text{H}_5)_2]_4$ . Thermal ellipsoids show the 50% probability density surfaces. The  $\text{PPh}_4^{1+}$  countercation and hydrogen atoms have been omitted.

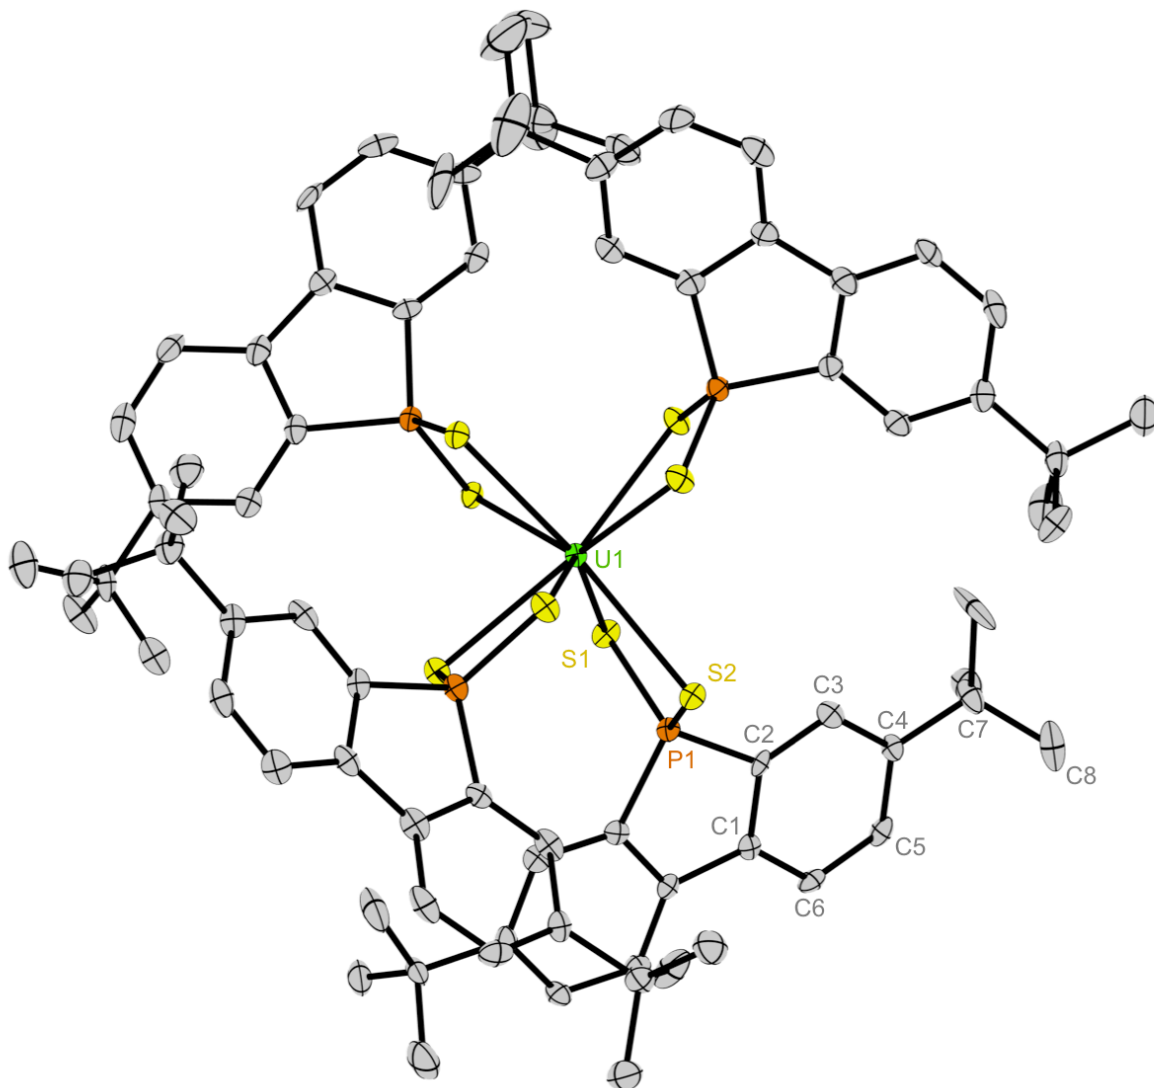

**Figure S2:** Molecular structure of  $\text{U}[\text{S}_2\text{P}(\text{t}\text{-Bu}_2\text{C}_{12}\text{H}_6)]_4$ . Thermal ellipsoids show the 50% probability density surfaces. The  $\text{PPh}_4^{1+}$  countercation and hydrogen atoms have been omitted.

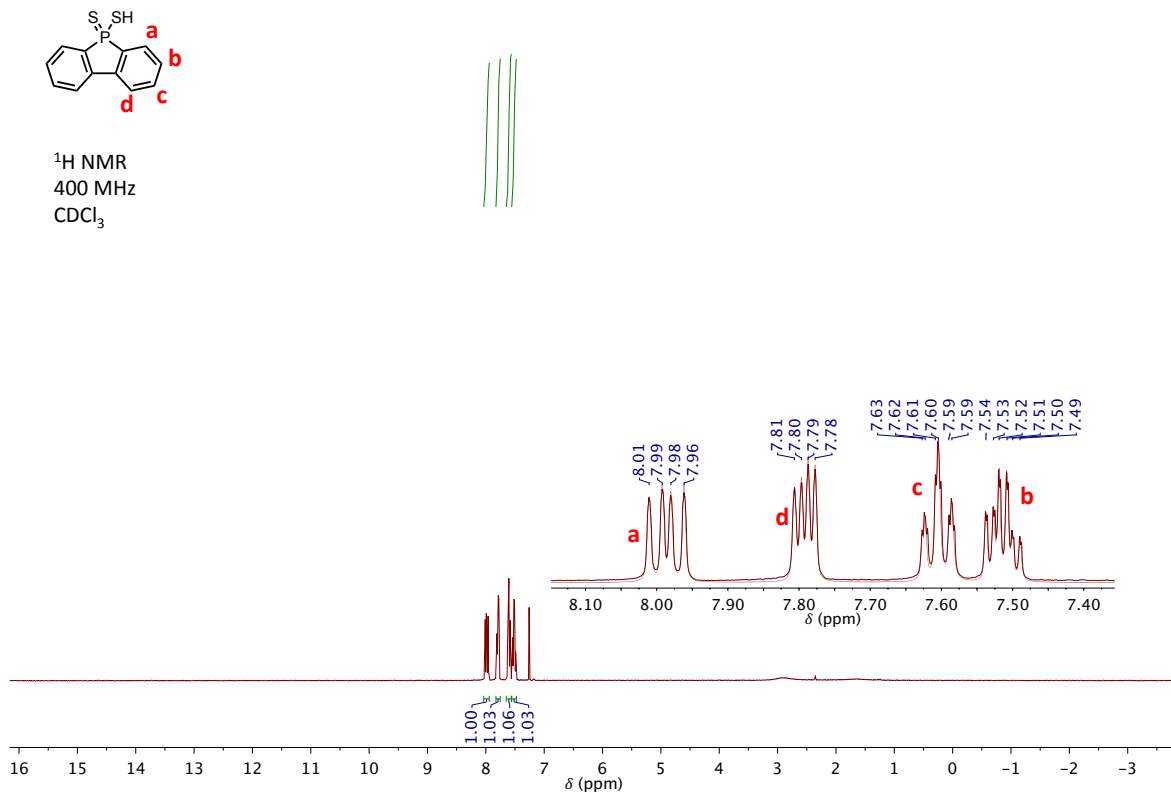

**Figure S3:** <sup>1</sup>H NMR spectrum of HS<sub>2</sub>P(C<sub>12</sub>H<sub>8</sub>).

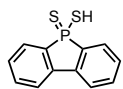

$^{31}\text{P}$  NMR  
162 MHz  
 $\text{CDCl}_3$

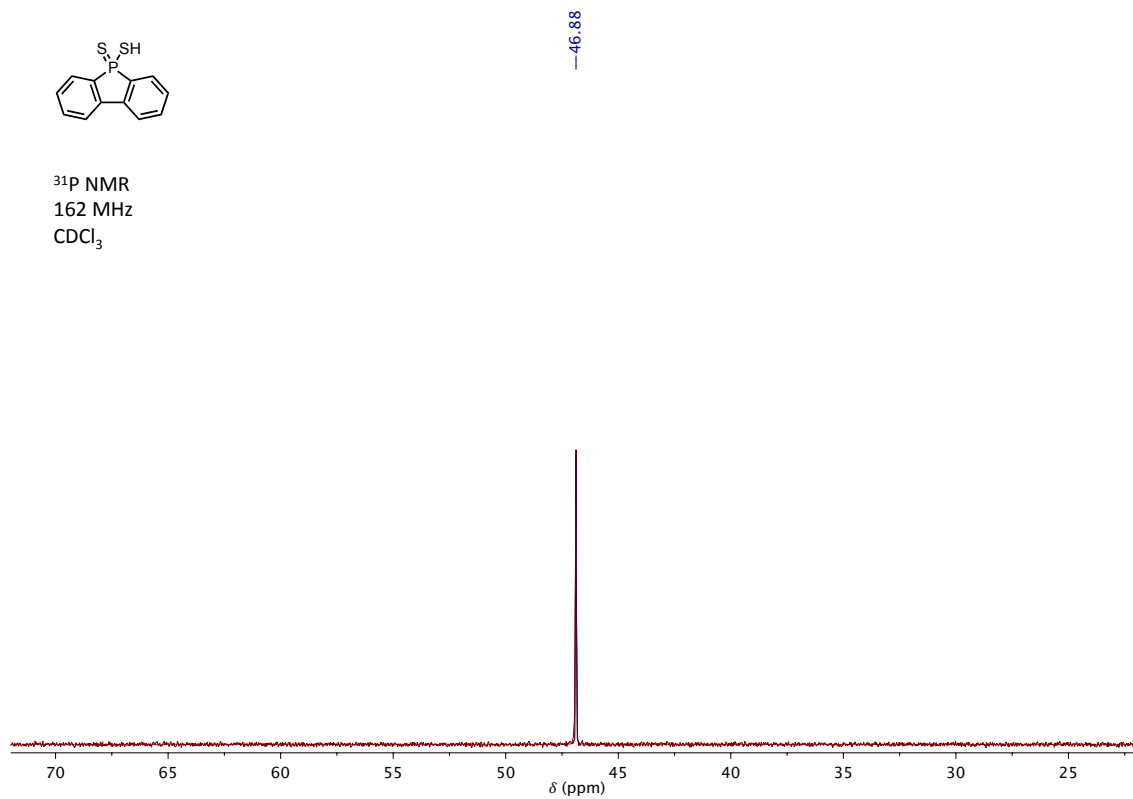

**Figure S4:**  $^{31}\text{P}$  NMR spectrum of  $\text{HS}_2\text{P}(\text{C}_{12}\text{H}_8)$ .

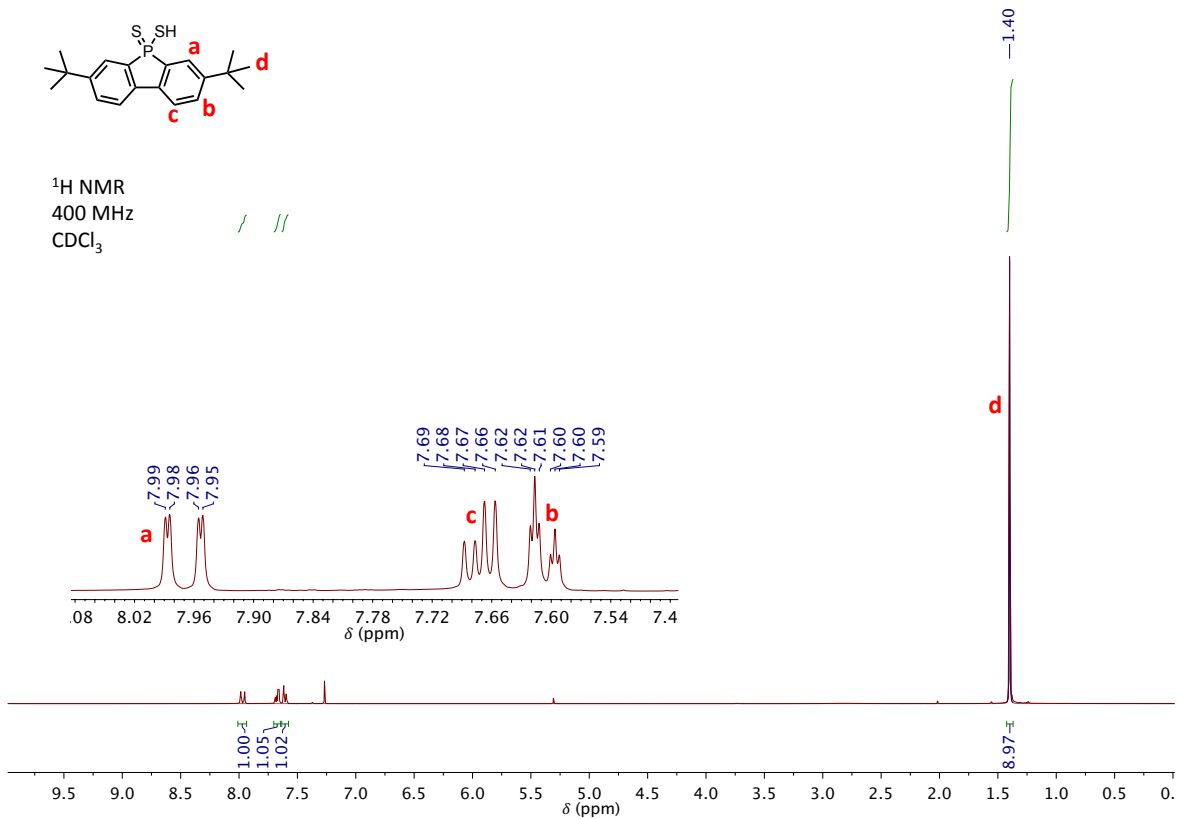

**Figure S5:** <sup>1</sup>H NMR spectrum of HS<sub>2</sub>P(<sup>t</sup>Bu<sub>2</sub>C<sub>12</sub>H<sub>6</sub>).

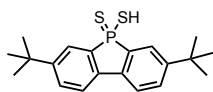

-46.43

$^{31}\text{P}$  NMR  
162 MHz  
 $\text{CDCl}_3$

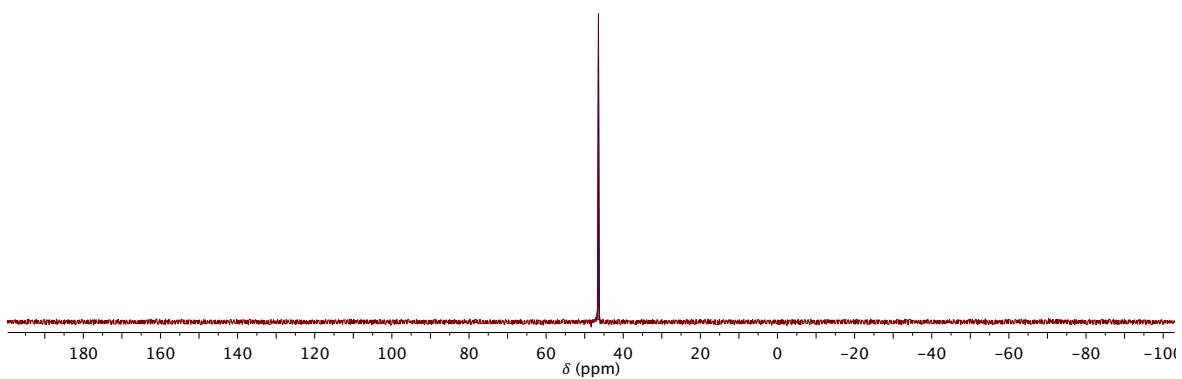

**Figure S6:**  $^{31}\text{P}$  NMR spectrum of  $\text{HS}_2\text{P}(\text{}^t\text{Bu}_2\text{C}_{12}\text{H}_6)$ .



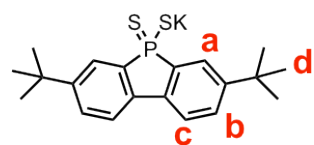

$^1\text{H}$  NMR  
400 MHz  
 $\text{d}_6$ -acetone

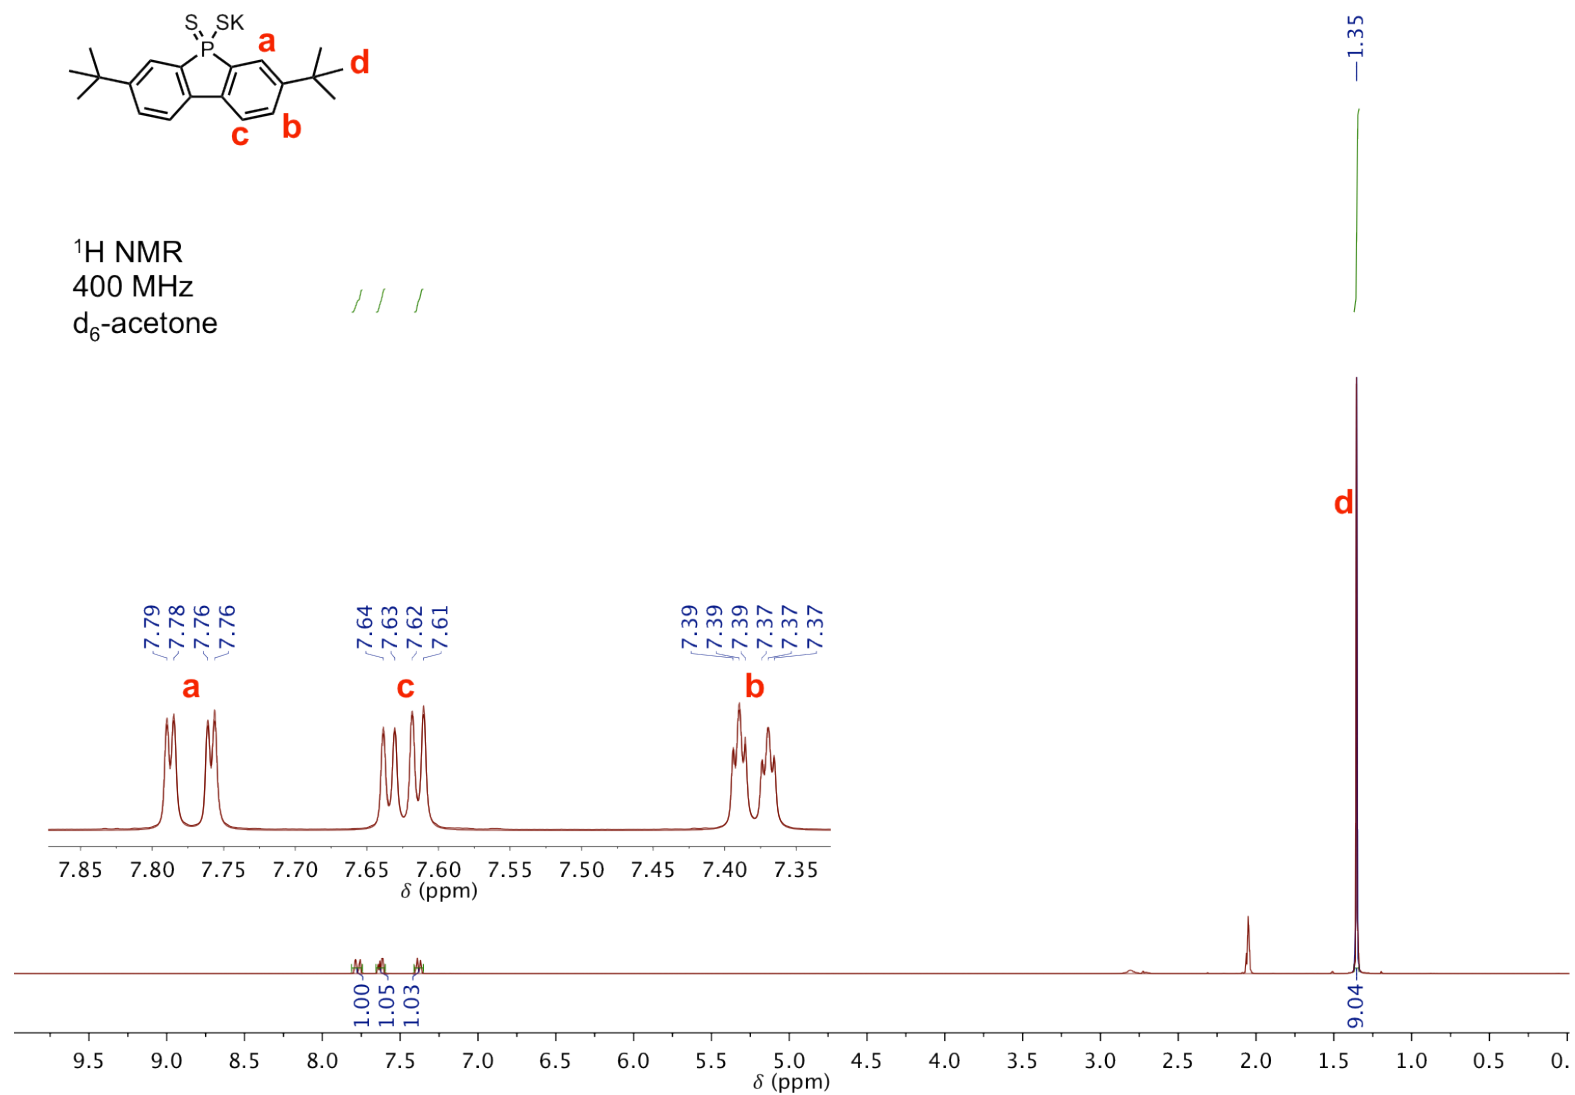

**Figure S3:**  $^1\text{H}$  NMR spectrum of  $\text{K}[\text{S}_2\text{P}(\text{tBu})_2]$ .

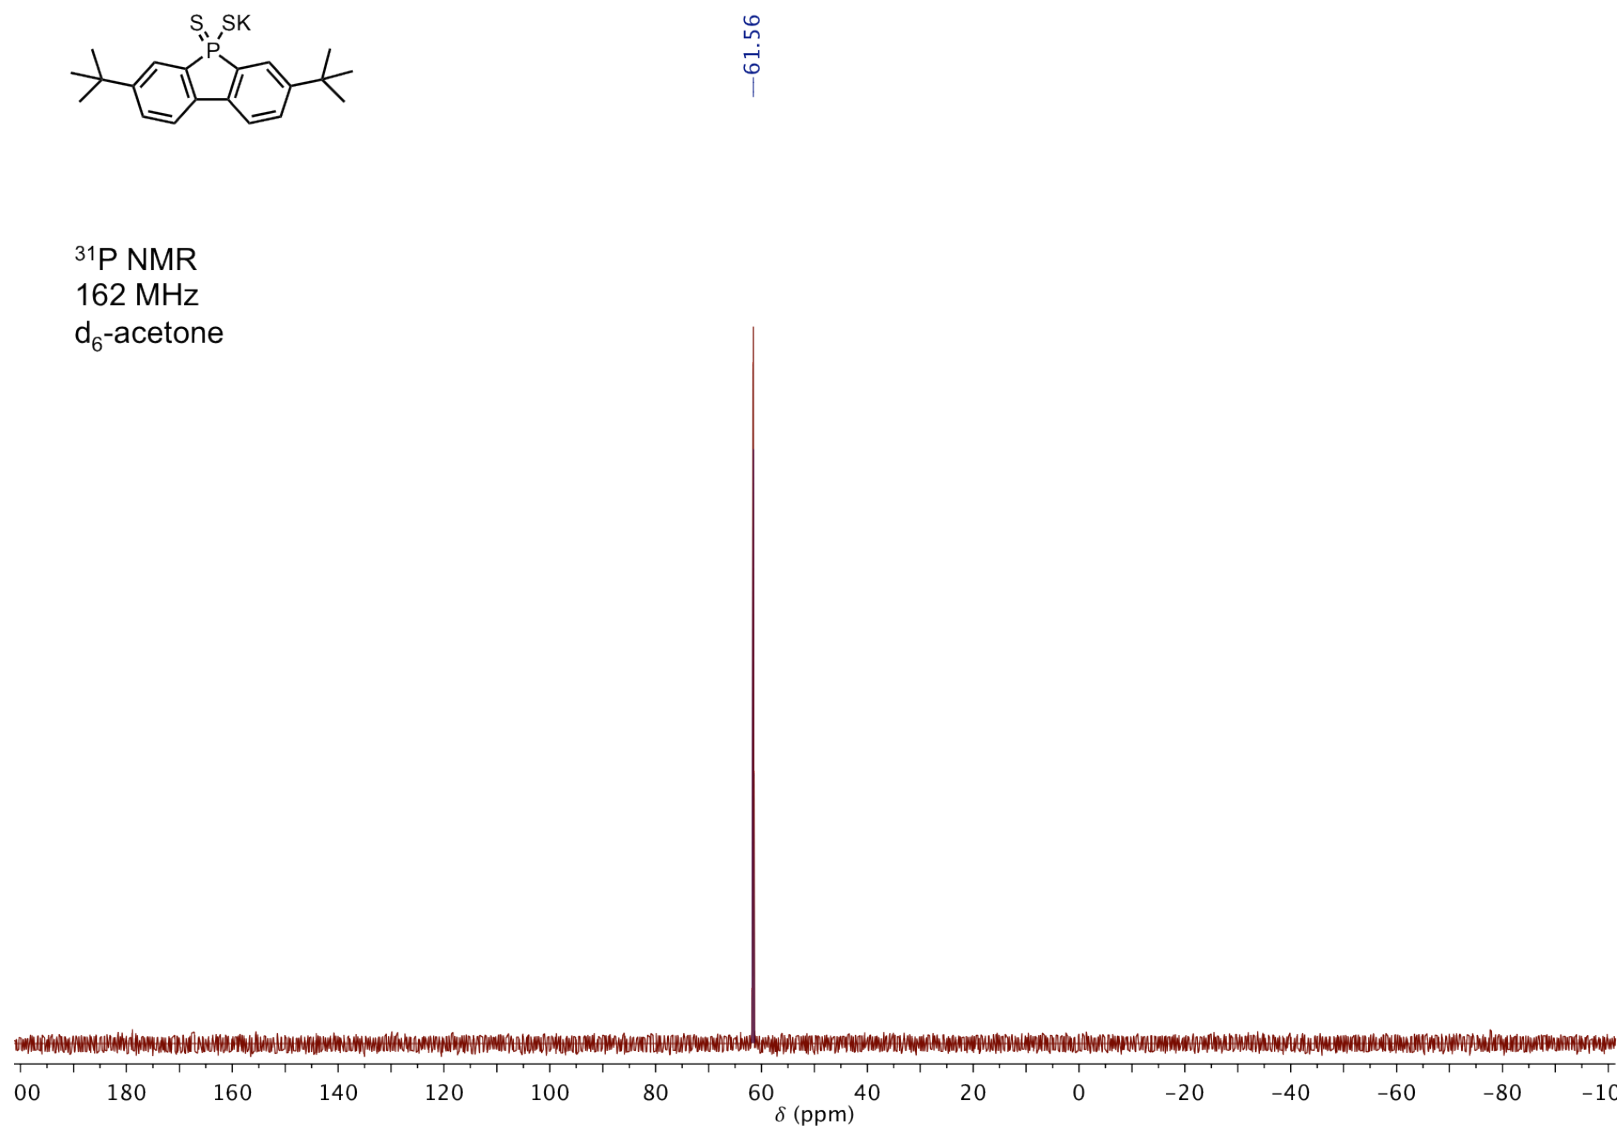

**Figure S4:**  $^{31}\text{P}$  NMR spectrum of  $\text{K}[\text{S}_2\text{P}(\text{tBu}_2\text{C}_{12}\text{H}_6)]$ .

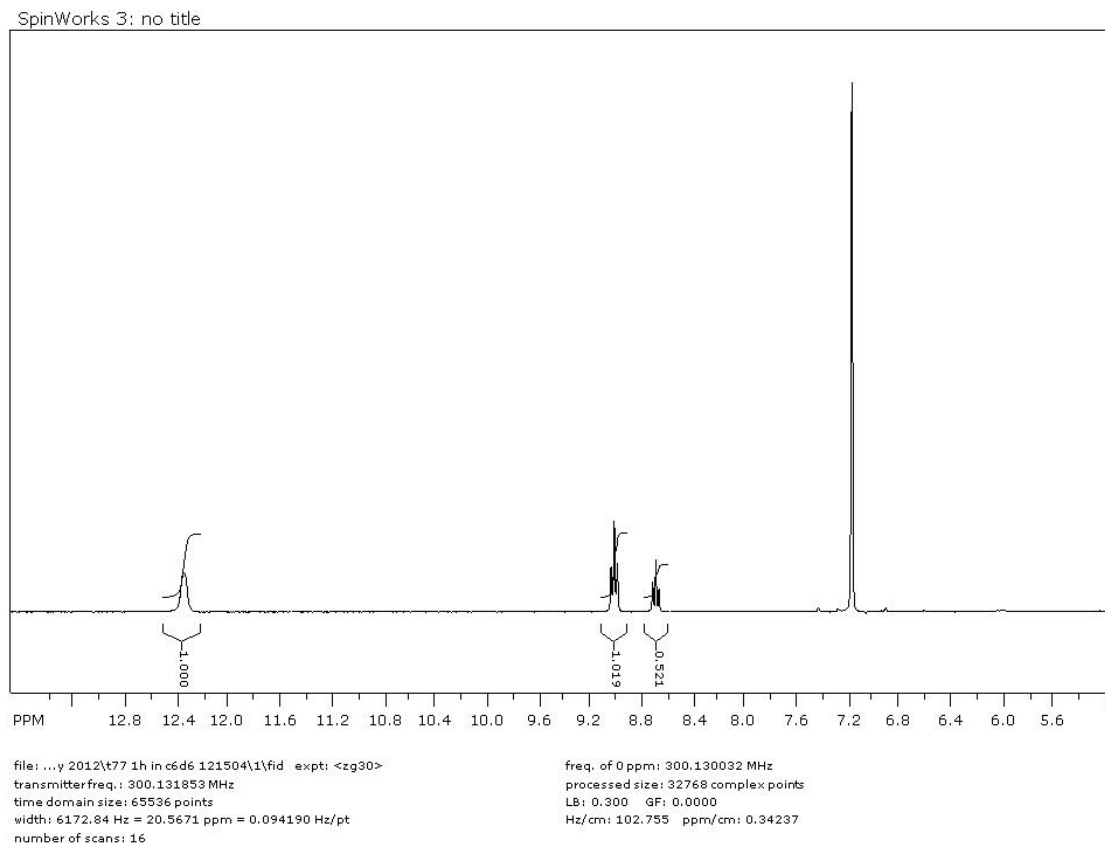

**Figure S11.**  $^1\text{H}$  NMR spectrum of  $\text{U}[\text{S}_2\text{P}(\text{C}_6\text{H}_5)_2]_4$ , dissolved in  $\text{C}_6\text{D}_6$  solvent.

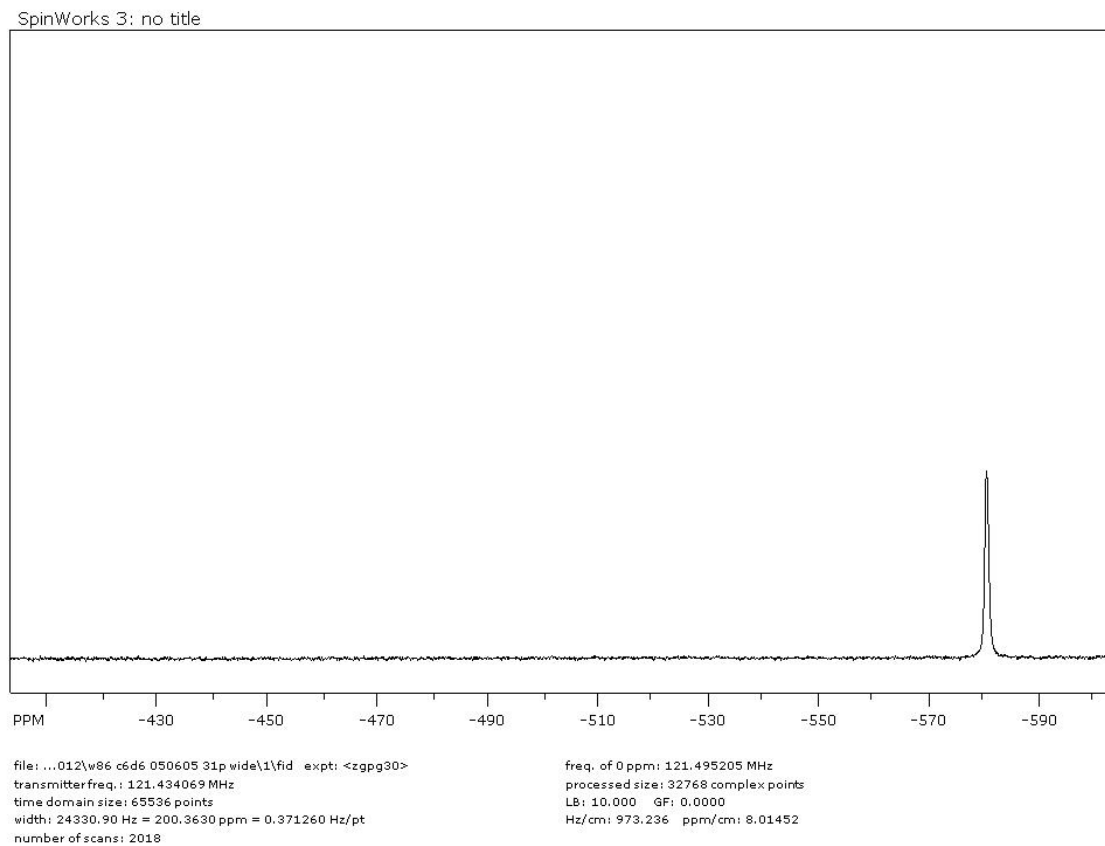

**Figure S12.**  $^{31}\text{P}$  NMR spectrum of  $\text{U}[\text{S}_2\text{P}(\text{C}_6\text{H}_5)_2]_4$ , dissolved in  $\text{C}_6\text{D}_6$  solvent.

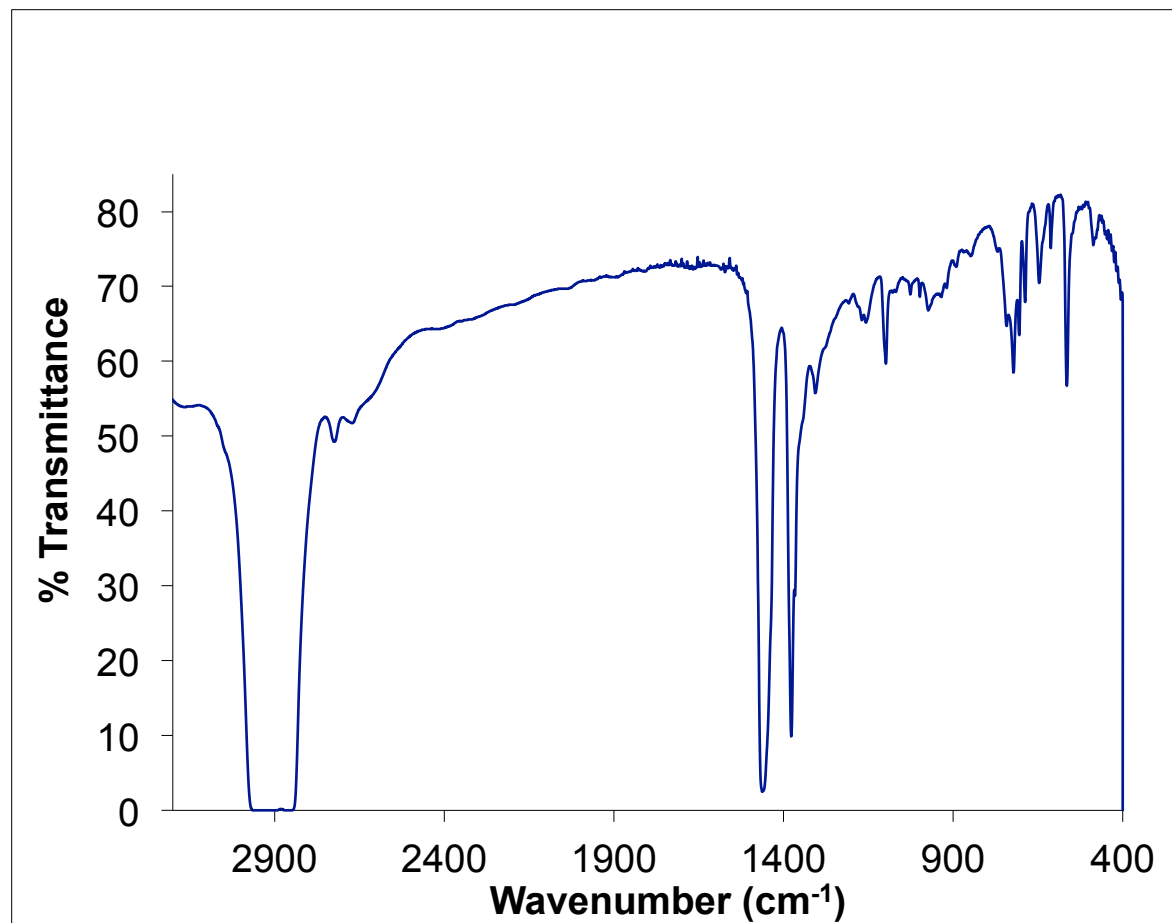

**Figure S9.** IR spectrum of  $\text{U}[\text{S}_2\text{P}(\text{C}_6\text{H}_5)_2]_4$ , recorded as a Nujol mull suspension.

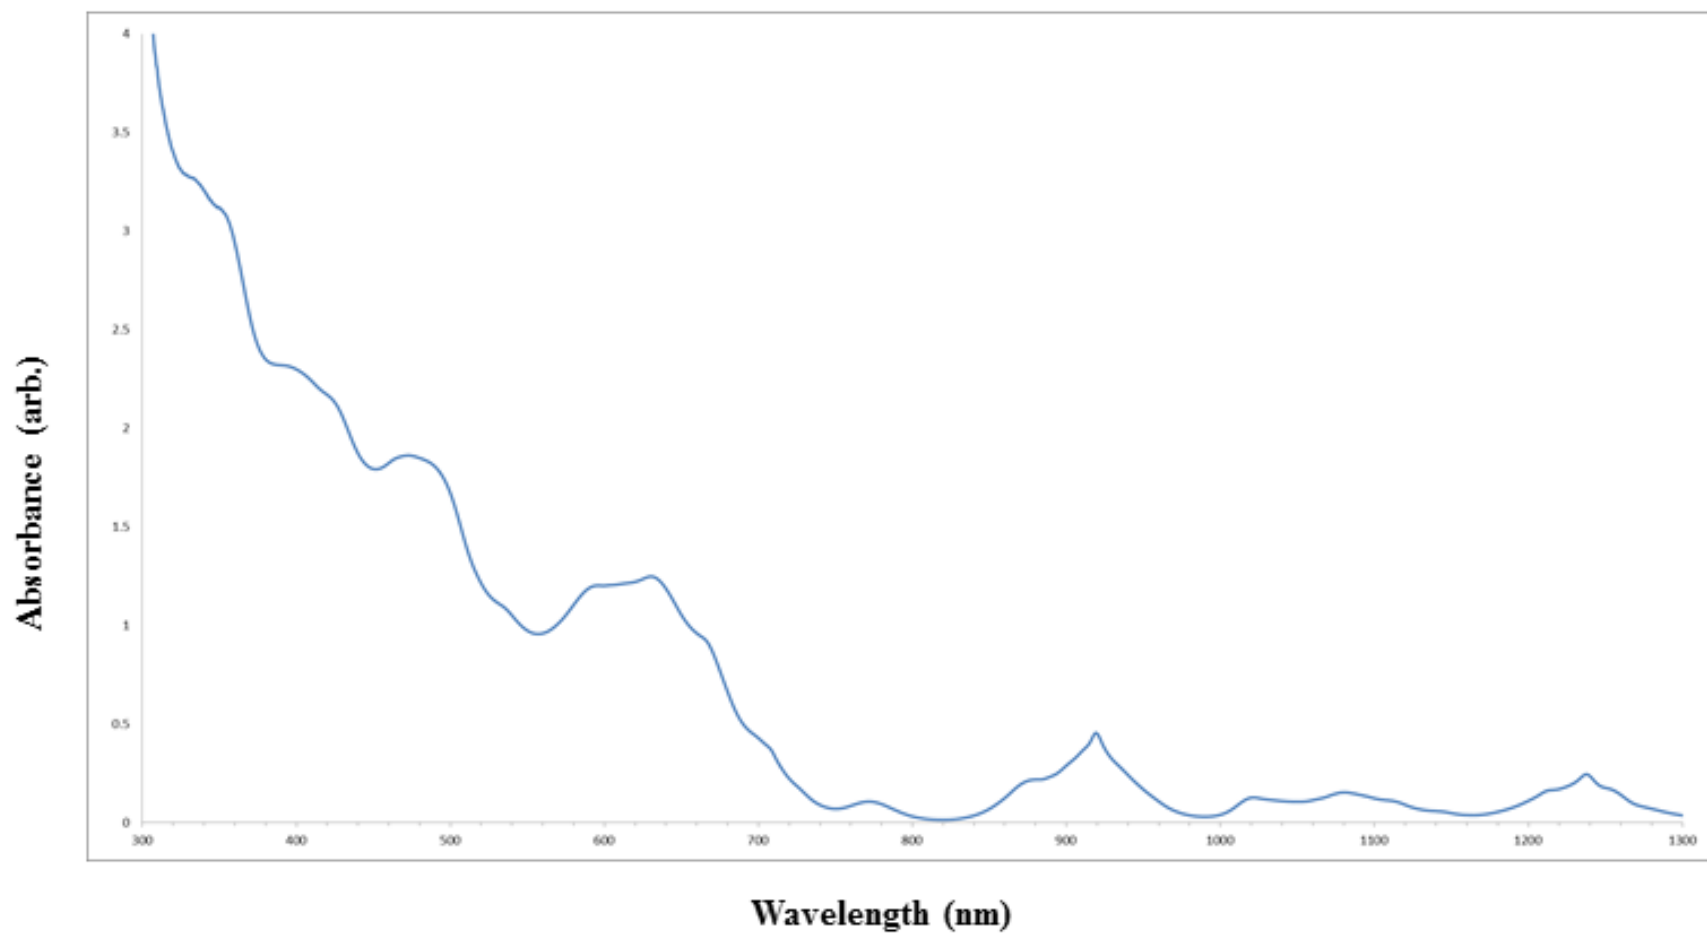

**Figure S10.** Electronic absorption spectrum of  $U[S_2P(C_6H_5)_2]_4$ , dissolved in THF solvent.

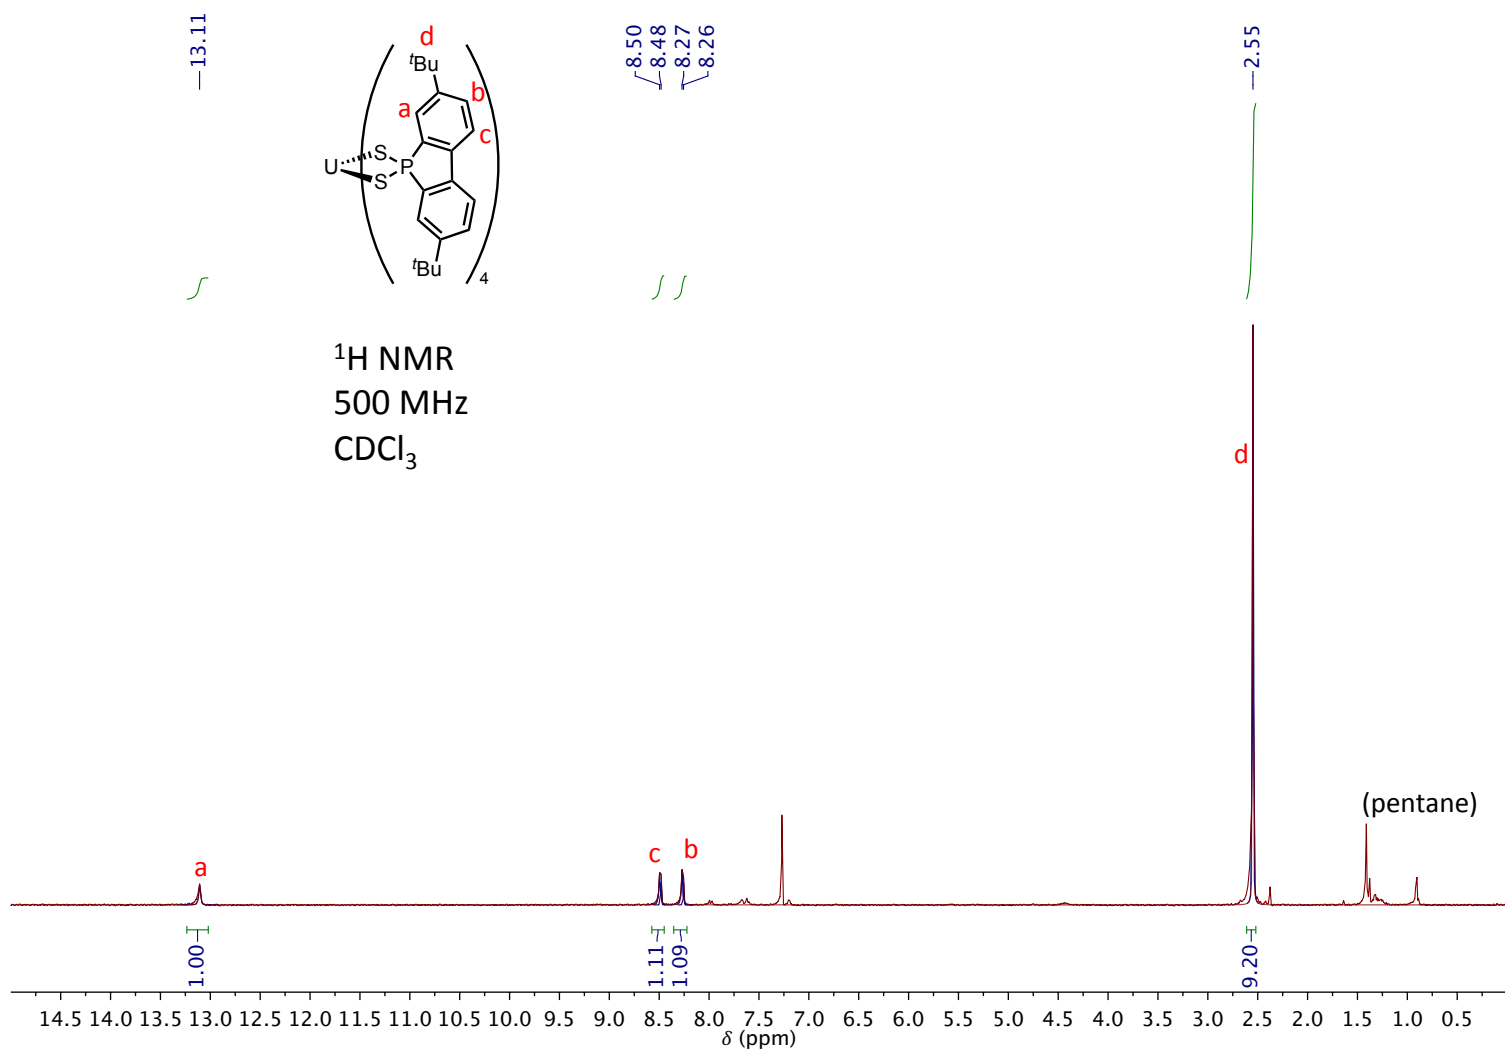

**Figure S9:**  $^1\text{H}$  NMR spectrum of  $\text{U}[\text{S}_2\text{P}(\text{tBu}_2\text{C}_{12}\text{H}_6)]_4$ .

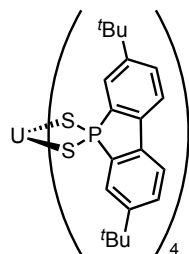

$^{31}\text{P}\{^1\text{H}\}$  NMR  
202 MHz  
 $\text{CDCl}_3$

—602.82

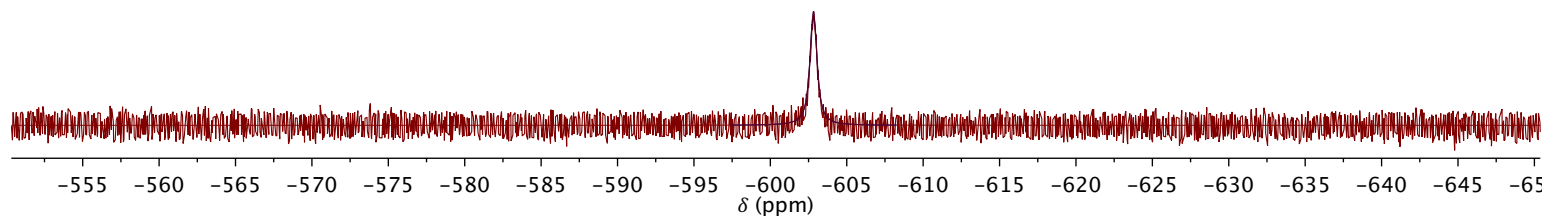

**Figure S10:**  $^{31}\text{P}$  NMR spectrum of  $\text{U}[\text{S}_2\text{P}(\text{tBu}_2\text{C}_{12}\text{H}_6)]_4$ .



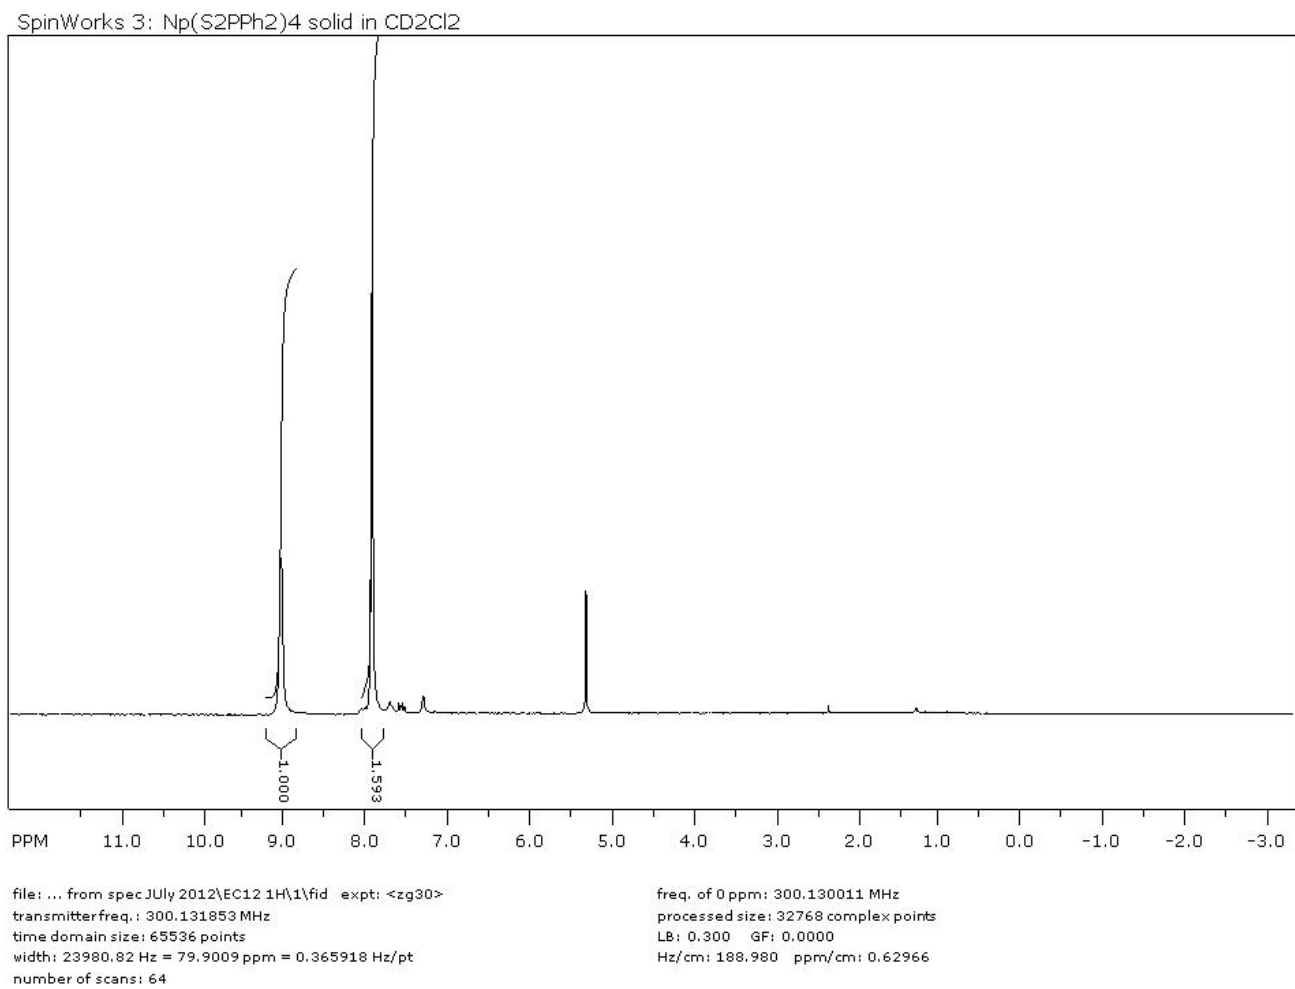

**Figure S7.** <sup>1</sup>H NMR spectrum of Np[S<sub>2</sub>P(C<sub>6</sub>H<sub>5</sub>)<sub>2</sub>]<sub>4</sub>, dissolved in CD<sub>2</sub>Cl<sub>2</sub> solvent.

SpinWorks 3: Np(S<sub>2</sub>PPh<sub>2</sub>)<sub>4</sub> solid in CD<sub>2</sub>Cl<sub>2</sub>

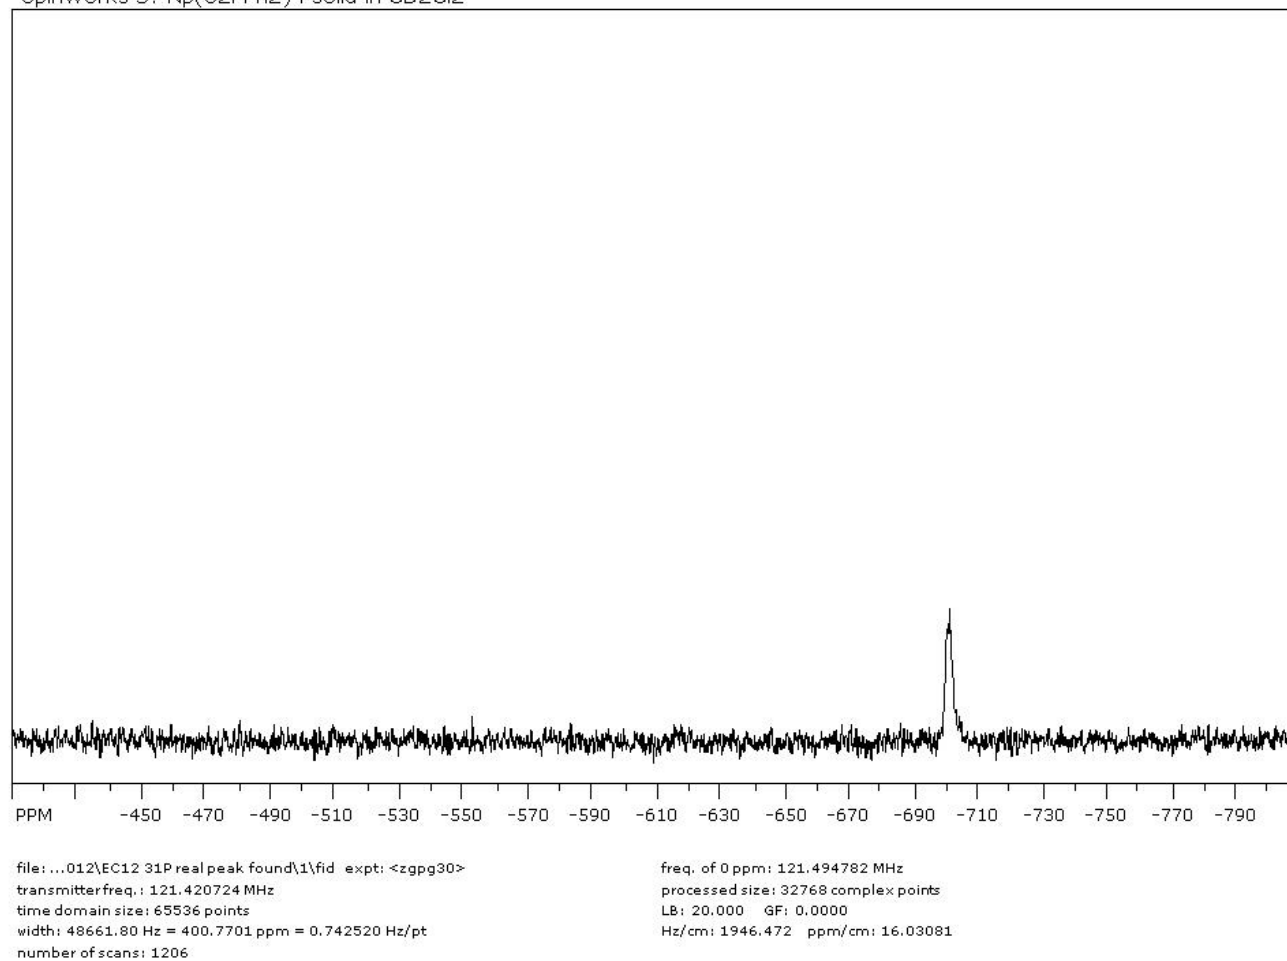

**Figure S8.** <sup>31</sup>P NMR spectrum of Np[S<sub>2</sub>P(C<sub>6</sub>H<sub>5</sub>)<sub>2</sub>]<sub>4</sub>, dissolved in CD<sub>2</sub>Cl<sub>2</sub> solvent.

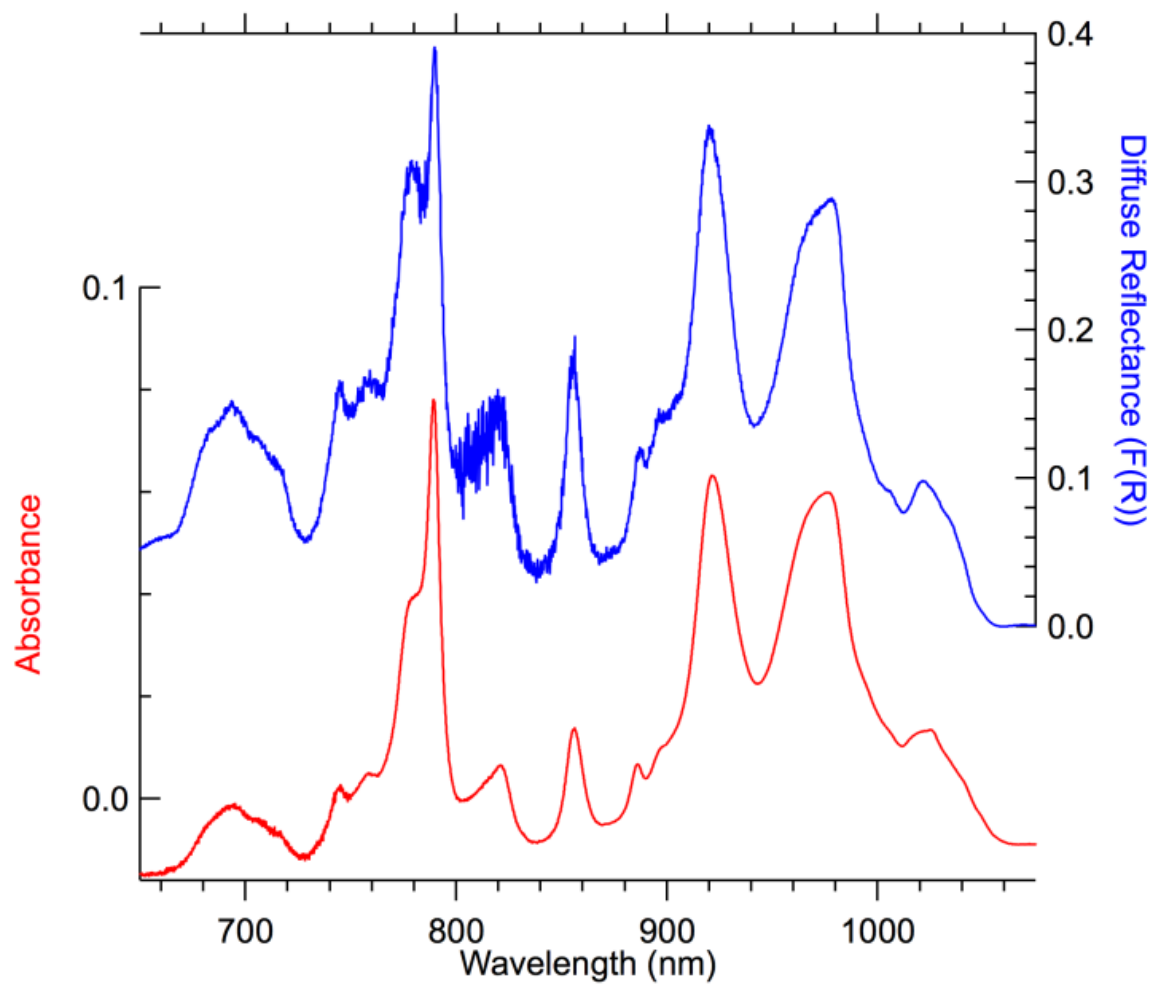

**Fig S5.** Vis/NIR diffuse reflectance solid-state spectrum of crystalline  $\text{Np}[\text{S}_2\text{P}(\text{C}_6\text{H}_5)_2]_4$  (blue line, top), and solution phase spectrum of  $\text{Np}[\text{S}_2\text{P}(\text{C}_6\text{H}_5)_2]_4$  dissolved in THF solvent (red line, bottom).

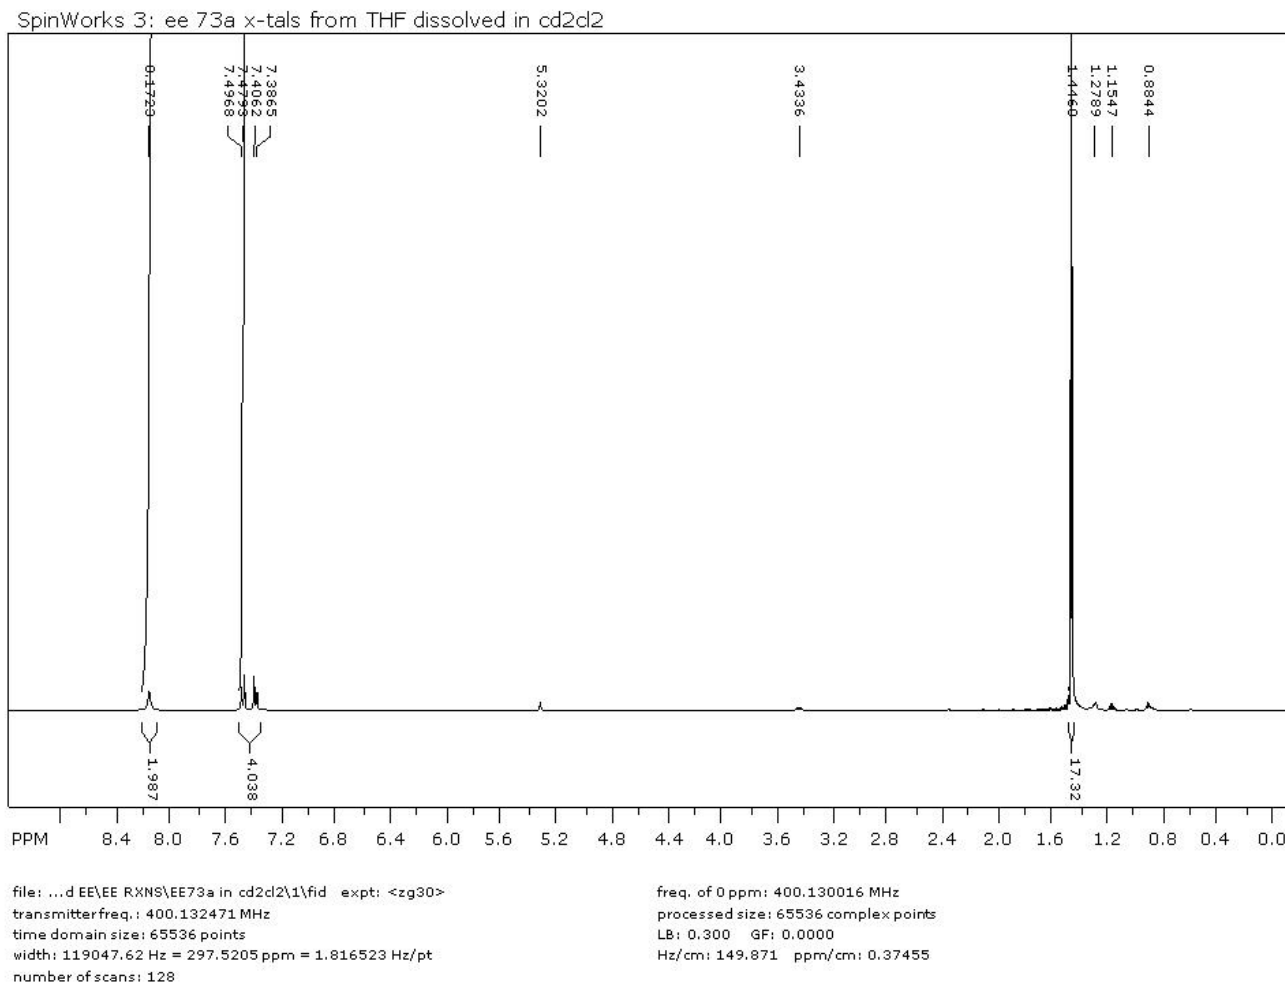

**Figure S13.**  $^1\text{H}$  NMR spectrum of  $\text{Np}[\text{S}_2\text{P}(\text{tBu}_2\text{C}_6\text{H}_6)_2]_4$ , dissolved in  $\text{CD}_2\text{Cl}_2$  solvent.

SpinWorks 3: ee73a in cd2d2 np(IV) tbu-dithio x-tals from THF 31P

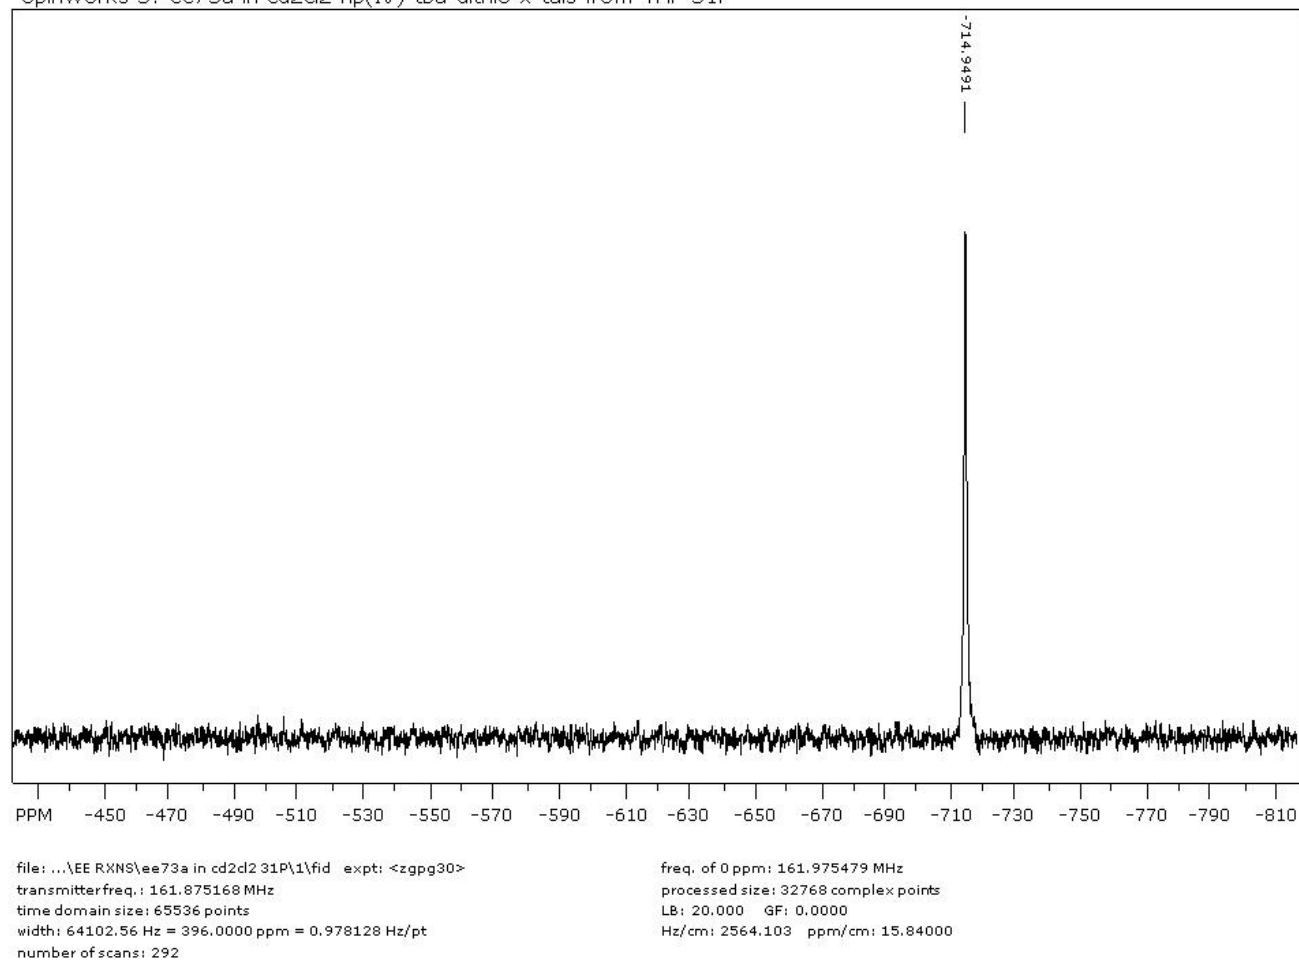

**Figure S14.**  $^{31}\text{P}$  NMR spectrum of  $\text{Np}[\text{S}_2\text{P}(\text{Bu}_2\text{C}_{12}\text{H}_8)]_4$ , dissolved in  $\text{CD}_2\text{Cl}_2$  solvent.

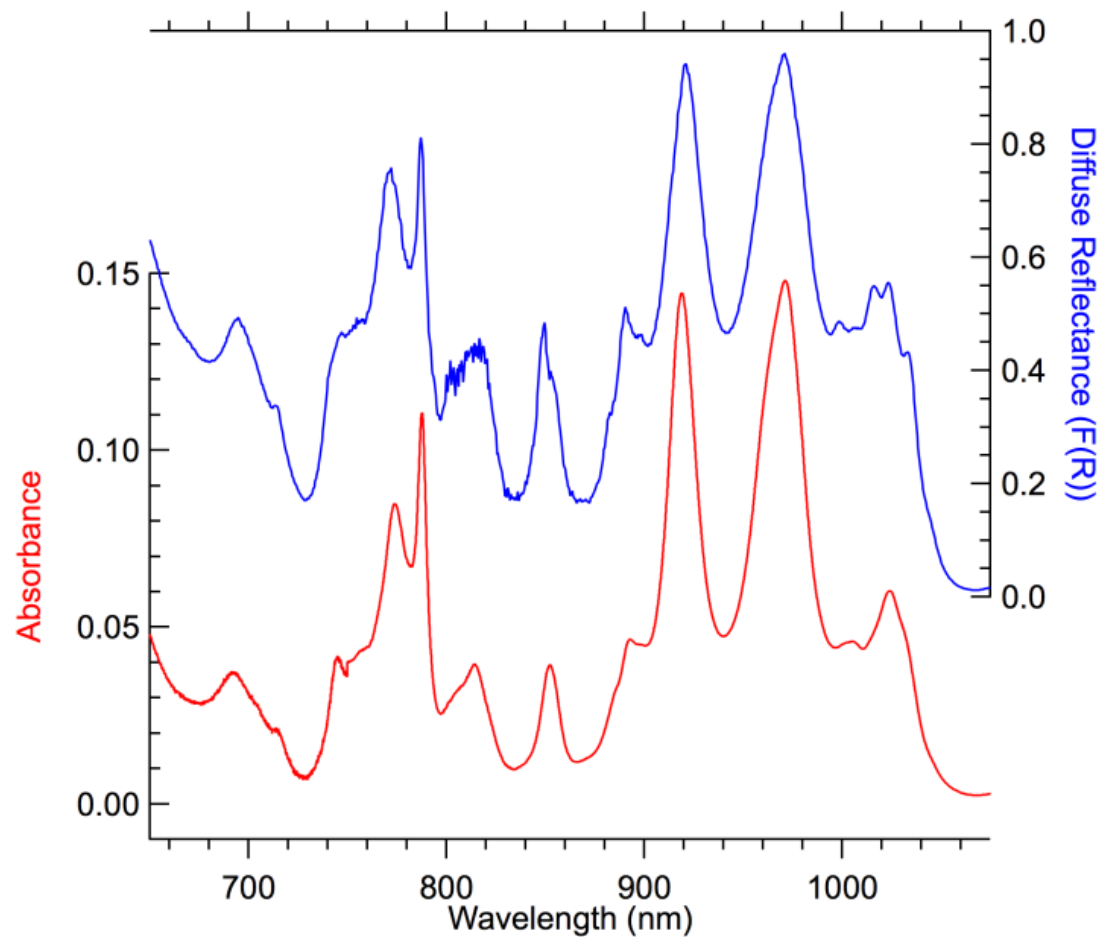

**Figure S6.** Vis/NIR diffuse reflectance solid-state spectrum of crystalline  $\text{Np}[\text{S}_2\text{P}(\text{BuC}_{12}\text{H}_8)]_4$  (blue line, top), and solution phase spectrum of  $\text{Np}[\text{S}_2\text{P}(\text{BuC}_{12}\text{H}_8)]_4$  dissolved in THF solvent (red line, bottom).

[PPh<sub>4</sub>][S<sub>2</sub>P(C<sub>12</sub>H<sub>8</sub>)] [AsPh<sub>4</sub>][S<sub>2</sub>P(<sup>t</sup>Bu<sub>2</sub>C<sub>12</sub>H<sub>6</sub>)]•0.5acetone

|                           |                    |                    |
|---------------------------|--------------------|--------------------|
| P-S (Å)                   | 1.9751             | 1.9797             |
|                           | 1.9781             | 1.9792             |
| <b>avg</b>                | <b>1.9766</b>      | <b>1.97945</b>     |
| <b>STDEV</b>              | <b>0.00212132</b>  | <b>0.000353553</b> |
| <b>STDEV(%)</b>           | <b>0.107321681</b> | <b>0.017861193</b> |
| <br>                      |                    |                    |
| P-C (Å)                   | 1.8197             | 1.8177             |
|                           | 1.8224             | 1.8218             |
| <b>AVG</b>                | <b>1.82105</b>     | <b>1.81975</b>     |
| <b>STDEV</b>              | <b>0.001909188</b> | <b>0.002899138</b> |
| <b>STDEV(%)</b>           | <b>0.104839972</b> | <b>0.15931517</b>  |
| <br>                      |                    |                    |
| S-P-S (°)                 | 118.53             | 119.22             |
| <br>                      |                    |                    |
| C-P-C (°)                 | 90.65              | 90.74              |
| <br>                      |                    |                    |
| C-C <sub>tether</sub> (Å) | 1.4684             | 1.476              |
| <br>                      |                    |                    |
| C-C <sub>arene</sub> (Å)  | 1.3836             | 1.382              |
|                           | 1.402              | 1.4                |
|                           | 1.3887             | 1.399              |
|                           | 1.3914             | 1.4                |
|                           | 1.3777             | 1.382              |
|                           | 1.3909             | 1.392              |
|                           | 1.3882             | 1.389              |
|                           | 1.3976             | 1.402              |
|                           | 1.3789             | 1.381              |
|                           | 1.3848             | 1.407              |
|                           | 1.3789             | 1.398              |
|                           | 1.383              | 1.386              |

|                 | <b>U(S<sub>2</sub>PPh<sub>2</sub>)<sub>4</sub>•THF</b> | <b>Np(S<sub>2</sub>PPh<sub>2</sub>)<sub>4</sub>•THF</b> | <b>Pu(S<sub>2</sub>PPh<sub>2</sub>)<sub>3</sub>(py)<sub>2</sub>•toluene</b> |
|-----------------|--------------------------------------------------------|---------------------------------------------------------|-----------------------------------------------------------------------------|
| <b>P-S (Å)</b>  | 2.011                                                  | 2.016                                                   | 1.998                                                                       |
|                 | 2.025                                                  | 2.0094                                                  | 1.99                                                                        |
|                 | 2.015                                                  | 2.0089                                                  | 1.998                                                                       |
|                 | 2.009                                                  | 2.0072                                                  | 1.996                                                                       |
|                 | 2.018                                                  | 2.0065                                                  | 2.006                                                                       |
|                 | 2.006                                                  | 2.0101                                                  | 1.991                                                                       |
|                 | 2.014                                                  | 2.0052                                                  |                                                                             |
|                 | 2.013                                                  | 2.0106                                                  |                                                                             |
| <b>avg</b>      | <b>2.013875</b>                                        | <b>2.0092375</b>                                        | <b>1.9965</b>                                                               |
| <b>STDEV</b>    | <b>0.005817154</b>                                     | <b>0.003304083</b>                                      | <b>0.005787918</b>                                                          |
| <b>STDEV(%)</b> | <b>0.288853798</b>                                     | <b>0.16444462</b>                                       | <b>0.289903253</b>                                                          |
| <b>P-C (Å)</b>  | 1.819                                                  | 1.8042                                                  | 1.822                                                                       |
|                 | 1.81                                                   | 1.81                                                    | 1.823                                                                       |
|                 | 1.809                                                  | 1.81                                                    | 1.816                                                                       |
|                 | 1.816                                                  | 1.8092                                                  | 1.809                                                                       |
|                 | 1.808                                                  | 1.8114                                                  | 1.809                                                                       |
|                 | 1.821                                                  | 1.8046                                                  | 1.818                                                                       |
|                 | 1.818                                                  | 1.8081                                                  |                                                                             |
|                 | 1.81                                                   | 1.8126                                                  |                                                                             |
| <b>AVG</b>      | <b>1.813875</b>                                        | <b>1.8087625</b>                                        | <b>1.816166667</b>                                                          |
| <b>STDEV</b>    | <b>0.005166859</b>                                     | <b>0.003012326</b>                                      | <b>0.006112828</b>                                                          |
| <b>STDEV(%)</b> | <b>0.28485197</b>                                      | <b>0.166540708</b>                                      | <b>0.336578584</b>                                                          |
| <b>M-S (Å)</b>  | 2.872                                                  | 2.8004                                                  | 2.937                                                                       |
|                 | 2.819                                                  | 2.8493                                                  | 2.934                                                                       |
|                 | 2.805                                                  | 2.7863                                                  | 2.923                                                                       |
|                 | 2.878                                                  | 2.8587                                                  | 2.932                                                                       |
|                 | 2.845                                                  | 2.8523                                                  | 2.957                                                                       |
|                 | 2.8557                                                 | 2.7853                                                  | 2.9                                                                         |
|                 | 2.808                                                  | 2.8334                                                  |                                                                             |
|                 | 2.8742                                                 | 2.8245                                                  |                                                                             |
| <b>avg</b>      | <b>2.8446125</b>                                       | <b>2.823775</b>                                         | <b>2.9305</b>                                                               |
| <b>STDEV</b>    | <b>0.030305419</b>                                     | <b>0.029783061</b>                                      | <b>0.018684218</b>                                                          |
| <b>STDEV(%)</b> | <b>1.065361927</b>                                     | <b>1.054725</b>                                         | <b>0.637577817</b>                                                          |



|                          | U(S <sub>2</sub> PPh <sub>2</sub> ) <sub>4</sub> •THF                                | Np(S <sub>2</sub> PPh <sub>2</sub> ) <sub>4</sub> •THF                                         | Pu(S <sub>2</sub> PPh <sub>2</sub> ) <sub>3</sub> (py) <sub>2</sub> •toluene      |
|--------------------------|--------------------------------------------------------------------------------------|------------------------------------------------------------------------------------------------|-----------------------------------------------------------------------------------|
| M–N (Å)                  |                                                                                      |                                                                                                | 2.624<br>2.607                                                                    |
| <b>AVG</b>               |                                                                                      |                                                                                                | <b>2.6155</b>                                                                     |
| <b>STDEV</b>             |                                                                                      |                                                                                                | <b>0.012020815</b>                                                                |
| <b>STDEV(%)</b>          |                                                                                      |                                                                                                | <b>0.459599131</b>                                                                |
| S–P–S (°)                | 109.23<br>109.46<br>109.47<br>109.33                                                 | 108.82<br>109.11<br>108.89<br>109.06                                                           | 111.66<br>112.52<br>111.26                                                        |
| <b>AVG</b>               | <b>109.3725</b>                                                                      | <b>108.97</b>                                                                                  | <b>111.8133333</b>                                                                |
| <b>STDEV</b>             | <b>0.114418821</b>                                                                   | <b>0.137355985</b>                                                                             | <b>0.643842631</b>                                                                |
| <b>STDEV(%)</b>          | <b>0.104613885</b>                                                                   | <b>0.126049358</b>                                                                             | <b>0.575819191</b>                                                                |
| C–P–C (°)                | 105.6<br>106.3<br>102.8<br>106.2                                                     | 105.53<br>106.05<br>106.08<br>103.17                                                           | 105.1<br>103.5<br>103.8                                                           |
| <b>AVG</b>               | <b>105.225</b>                                                                       | <b>105.2075</b>                                                                                | <b>104.1333333</b>                                                                |
| <b>STDEV</b>             | <b>1.645954637</b>                                                                   | <b>1.381602331</b>                                                                             | <b>0.850490055</b>                                                                |
| <b>STDEV(%)</b>          | <b>1.564223936</b>                                                                   | <b>1.313216577</b>                                                                             | <b>0.816731807</b>                                                                |
| S–M–S (°)                | 70.64<br>70.63<br>70.4<br>70.63                                                      | 70.81<br>70.83<br>70.84<br>70.63                                                               | 68.39<br>69.12<br>68.56                                                           |
| <b>AVG</b>               | <b>70.575</b>                                                                        | <b>70.7775</b>                                                                                 | <b>68.69</b>                                                                      |
| <b>STDEV</b>             | <b>0.116761866</b>                                                                   | <b>0.099121138</b>                                                                             | <b>0.381968585</b>                                                                |
| <b>STDEV(%)</b>          | <b>0.165443664</b>                                                                   | <b>0.140046114</b>                                                                             | <b>0.556075972</b>                                                                |
| C–C <sub>arene</sub> (Å) | 1.391<br>1.391<br>1.384<br>1.386<br>1.39<br>1.399<br>1.385<br>1.399<br>1.394<br>1.39 | 1.3962<br>1.3869<br>1.3852<br>1.3828<br>1.3858<br>1.3831<br>1.39<br>1.3868<br>1.3851<br>1.3767 | 1.38<br>1.36<br>1.397<br>1.34<br>1.34<br>1.401<br>1.385<br>1.382<br>1.378<br>1.37 |

|                                | <b>U(S<sub>2</sub>PPh<sub>2</sub>)<sub>4</sub>•THF</b> | <b>Np(S<sub>2</sub>PPh<sub>2</sub>)<sub>4</sub>•THF</b> | <b>Pu(S<sub>2</sub>PPh<sub>2</sub>)<sub>3</sub>(py)<sub>2</sub>•toluene</b> |
|--------------------------------|--------------------------------------------------------|---------------------------------------------------------|-----------------------------------------------------------------------------|
| <b>C–C<sub>arene</sub> (Å)</b> | 1.392                                                  | 1.3856                                                  | 1.39                                                                        |
|                                | 1.389                                                  | 1.3875                                                  | 1.375                                                                       |
|                                | 1.393                                                  | 1.3783                                                  | 1.388                                                                       |
|                                | 1.379                                                  | 1.3798                                                  | 1.39                                                                        |
|                                | 1.376                                                  | 1.375                                                   | 1.378                                                                       |
|                                | 1.37                                                   | 1.3695                                                  | 1.368                                                                       |
|                                | 1.398                                                  | 1.389                                                   | 1.383                                                                       |
|                                | 1.391                                                  | 1.3902                                                  | 1.403                                                                       |
|                                | 1.401                                                  | 1.389                                                   | 1.384                                                                       |
|                                | 1.393                                                  | 1.3865                                                  | 1.387                                                                       |
|                                | 1.369                                                  | 1.3737                                                  | 1.38                                                                        |
|                                | 1.386                                                  | 1.3722                                                  | 1.372                                                                       |
|                                | 1.392                                                  | 1.3899                                                  | 1.395                                                                       |
|                                | 1.395                                                  | 1.3898                                                  | 1.387                                                                       |
|                                | 1.391                                                  | 1.386                                                   | 1.382                                                                       |
|                                | 1.381                                                  | 1.3772                                                  | 1.367                                                                       |
|                                | 1.379                                                  | 1.3743                                                  | 1.377                                                                       |
|                                | 1.388                                                  | 1.373                                                   | 1.373                                                                       |
|                                | 1.386                                                  | 1.3837                                                  | 1.38                                                                        |
|                                | 1.385                                                  | 1.3913                                                  | 1.384                                                                       |
|                                | 1.383                                                  | 1.3845                                                  | 1.379                                                                       |
|                                | 1.391                                                  | 1.3901                                                  | 1.392                                                                       |
|                                | 1.381                                                  | 1.3721                                                  | 1.36                                                                        |
|                                | 1.37                                                   | 1.3706                                                  | 1.375                                                                       |
|                                | 1.399                                                  | 1.386                                                   | 1.392                                                                       |
|                                | 1.392                                                  | 1.3883                                                  |                                                                             |
|                                | 1.395                                                  | 1.387                                                   |                                                                             |
|                                | 1.377                                                  | 1.3935                                                  |                                                                             |
|                                | 1.386                                                  | 1.3736                                                  |                                                                             |
|                                | 1.378                                                  | 1.3809                                                  |                                                                             |
|                                | 1.395                                                  | 1.3835                                                  |                                                                             |
|                                | 1.393                                                  | 1.3897                                                  |                                                                             |
|                                | 1.389                                                  | 1.3843                                                  |                                                                             |
|                                | 1.386                                                  | 1.3863                                                  |                                                                             |
|                                | 1.39                                                   | 1.377                                                   |                                                                             |
|                                | 1.37                                                   | 1.374                                                   |                                                                             |
|                                | 1.386                                                  | 1.389                                                   |                                                                             |
| <b>AVG</b>                     | <b>1.3874375</b>                                       | <b>1.383066667</b>                                      | <b>1.379444444</b>                                                          |
| <b>STDEV</b>                   | <b>0.008052768</b>                                     | <b>0.00679115</b>                                       | <b>0.013966172</b>                                                          |
| <b>STDEV(%)</b>                | <b>0.580405829</b>                                     | <b>0.49102115</b>                                       | <b>1.012449058</b>                                                          |

|                 | <b>U[S<sub>2</sub>P(<sup>t</sup>Bu<sub>2</sub>C<sub>12</sub>H<sub>6</sub>)]<sub>4</sub>•toluene</b> | <b>Np[S<sub>2</sub>P(<sup>t</sup>Bu<sub>2</sub>C<sub>12</sub>H<sub>6</sub>)]<sub>4</sub>•4toluene</b> |
|-----------------|-----------------------------------------------------------------------------------------------------|-------------------------------------------------------------------------------------------------------|
| <b>P-S (Å)</b>  | 2.0019                                                                                              | 2.002                                                                                                 |
|                 | 1.9931                                                                                              | 2.007                                                                                                 |
|                 | 1.9943                                                                                              | 1.9952                                                                                                |
|                 | 2.0083                                                                                              | 2.009                                                                                                 |
|                 | 2.0072                                                                                              |                                                                                                       |
|                 | 1.9916                                                                                              |                                                                                                       |
|                 | 1.9986                                                                                              |                                                                                                       |
|                 | 2.009                                                                                               |                                                                                                       |
| <b>avg</b>      | <b>2.0005</b>                                                                                       | <b>2.0033</b>                                                                                         |
| <b>STDEV</b>    | <b>0.007131019</b>                                                                                  | <b>0.006150339</b>                                                                                    |
| <b>STDEV(%)</b> | <b>0.356461823</b>                                                                                  | <b>0.30701037</b>                                                                                     |
| <b>P-C (Å)</b>  | 1.8048                                                                                              | 1.793                                                                                                 |
|                 | 1.8019                                                                                              | 1.793                                                                                                 |
|                 | 1.7892                                                                                              | 1.798                                                                                                 |
|                 | 1.7992                                                                                              | 1.793                                                                                                 |
|                 | 1.794                                                                                               |                                                                                                       |
|                 | 1.7985                                                                                              |                                                                                                       |
|                 | 1.7991                                                                                              |                                                                                                       |
|                 | 1.814                                                                                               |                                                                                                       |
| <b>AVG</b>      | <b>1.8000875</b>                                                                                    | <b>1.79425</b>                                                                                        |
| <b>STDEV</b>    | <b>0.007357491</b>                                                                                  | <b>0.0025</b>                                                                                         |
| <b>STDEV(%)</b> | <b>0.408729649</b>                                                                                  | <b>0.139333984</b>                                                                                    |
| <b>M-S (Å)</b>  | 2.8522                                                                                              | 2.8328                                                                                                |
|                 | 2.8243                                                                                              | 2.8253                                                                                                |
|                 | 2.8524                                                                                              | 2.8364                                                                                                |
|                 | 2.817                                                                                               | 2.8162                                                                                                |
|                 | 2.8307                                                                                              |                                                                                                       |
|                 | 2.8589                                                                                              |                                                                                                       |
|                 | 2.8634                                                                                              |                                                                                                       |
|                 | 2.8722                                                                                              |                                                                                                       |
| <b>avg</b>      | <b>2.8463875</b>                                                                                    | <b>2.827675</b>                                                                                       |
| <b>STDEV</b>    | <b>0.019927686</b>                                                                                  | <b>0.00893882</b>                                                                                     |
| <b>STDEV(%)</b> | <b>0.700104474</b>                                                                                  | <b>0.316119067</b>                                                                                    |

|                           | U[S <sub>2</sub> P( <sup>t</sup> Bu <sub>2</sub> C <sub>12</sub> H <sub>6</sub> )] <sub>4</sub> •toluene | Np[S <sub>2</sub> P( <sup>t</sup> Bu <sub>2</sub> C <sub>12</sub> H <sub>6</sub> )] <sub>4</sub> •4toluene |
|---------------------------|----------------------------------------------------------------------------------------------------------|------------------------------------------------------------------------------------------------------------|
| S–P–S (°)                 | 108.19                                                                                                   | 109.78                                                                                                     |
|                           | 110.07                                                                                                   | 109.73                                                                                                     |
|                           | 110.35                                                                                                   |                                                                                                            |
|                           | 108.82                                                                                                   |                                                                                                            |
| <b>AVG</b>                | <b>109.3575</b>                                                                                          | <b>109.755</b>                                                                                             |
| <b>STDEV</b>              | <b>1.023828599</b>                                                                                       | <b>0.035355339</b>                                                                                         |
| <b>STDEV(%)</b>           | <b>0.936221657</b>                                                                                       | <b>0.032212964</b>                                                                                         |
| C–P–C (°)                 | 92.3                                                                                                     | 92.7                                                                                                       |
|                           | 92.65                                                                                                    | 92.3                                                                                                       |
|                           | 92.58                                                                                                    |                                                                                                            |
|                           | 92.17                                                                                                    |                                                                                                            |
| <b>AVG</b>                | <b>92.425</b>                                                                                            | <b>92.5</b>                                                                                                |
| <b>STDEV</b>              | <b>0.227522893</b>                                                                                       | <b>0.282842712</b>                                                                                         |
| <b>STDEV(%)</b>           | <b>0.246170292</b>                                                                                       | <b>0.305775905</b>                                                                                         |
| S–M–S (°)                 | 69.51                                                                                                    | 70.85                                                                                                      |
|                           | 70.7                                                                                                     | 70.8                                                                                                       |
|                           | 70.47                                                                                                    |                                                                                                            |
|                           | 69.25                                                                                                    |                                                                                                            |
| <b>AVG</b>                | <b>69.9825</b>                                                                                           | <b>70.825</b>                                                                                              |
| <b>STDEV</b>              | <b>0.709994131</b>                                                                                       | <b>0.035355339</b>                                                                                         |
| <b>STDEV(%)</b>           | <b>1.014530963</b>                                                                                       | <b>0.049919293</b>                                                                                         |
| C–C <sub>tether</sub> (Å) | 1.4741                                                                                                   | 1.479                                                                                                      |
|                           | 1.4833                                                                                                   | 1.475                                                                                                      |
|                           | 1.4723                                                                                                   |                                                                                                            |
|                           | 1.4773                                                                                                   |                                                                                                            |
| <b>AVG</b>                | <b>1.47675</b>                                                                                           | <b>1.477</b>                                                                                               |
| <b>STDEV</b>              | <b>0.004831494</b>                                                                                       | <b>0.002828427</b>                                                                                         |
| <b>STDEV(%)</b>           | <b>0.32717074</b>                                                                                        | <b>0.191498113</b>                                                                                         |
| C–C <sub>arene</sub> (Å)  | 1.377                                                                                                    | 1.3864                                                                                                     |
|                           | 1.3925                                                                                                   | 1.402                                                                                                      |
|                           | 1.4042                                                                                                   | 1.396                                                                                                      |
|                           | 1.3923                                                                                                   | 1.404                                                                                                      |
|                           | 1.3787                                                                                                   | 1.39                                                                                                       |
|                           | 1.3911                                                                                                   | 1.399                                                                                                      |
|                           | 1.3735                                                                                                   | 1.39                                                                                                       |
|                           | 1.402                                                                                                    | 1.401                                                                                                      |

|                                | <b>U[S<sub>2</sub>P(<sup>t</sup>Bu<sub>2</sub>C<sub>12</sub>H<sub>6</sub>)]<sub>4</sub>•toluene</b> | <b>Np[S<sub>2</sub>P(<sup>t</sup>Bu<sub>2</sub>C<sub>12</sub>H<sub>6</sub>)]<sub>4</sub>•4toluene</b> |
|--------------------------------|-----------------------------------------------------------------------------------------------------|-------------------------------------------------------------------------------------------------------|
| <b>C–C<sub>arene</sub> (Å)</b> | 1.3999                                                                                              | 1.393                                                                                                 |
|                                | 1.386                                                                                               | 1.402                                                                                                 |
|                                | 1.3898                                                                                              | 1.39                                                                                                  |
|                                | 1.3814                                                                                              | 1.397                                                                                                 |
|                                | 1.4006                                                                                              | 1.397                                                                                                 |
|                                | 1.3795                                                                                              | 1.403                                                                                                 |
|                                | 1.3971                                                                                              | 1.406                                                                                                 |
|                                | 1.3799                                                                                              | 1.383                                                                                                 |
|                                | 1.3969                                                                                              | 1.404                                                                                                 |
|                                | 1.3822                                                                                              | 1.394                                                                                                 |
|                                | 1.4003                                                                                              | 1.398                                                                                                 |
|                                | 1.3812                                                                                              | 1.397                                                                                                 |
|                                | 1.393                                                                                               | 1.404                                                                                                 |
|                                | 1.4067                                                                                              | 1.389                                                                                                 |
|                                | 1.3852                                                                                              | 1.391                                                                                                 |
|                                | 1.3885                                                                                              |                                                                                                       |
|                                | 1.392                                                                                               |                                                                                                       |
|                                | 1.3884                                                                                              |                                                                                                       |
|                                | 1.3991                                                                                              |                                                                                                       |
|                                | 1.3806                                                                                              |                                                                                                       |
|                                | 1.3896                                                                                              |                                                                                                       |
|                                | 1.3836                                                                                              |                                                                                                       |
|                                | 1.4074                                                                                              |                                                                                                       |
|                                | 1.3822                                                                                              |                                                                                                       |
|                                | 1.3835                                                                                              |                                                                                                       |
|                                | 1.3993                                                                                              |                                                                                                       |
|                                | 1.3718                                                                                              |                                                                                                       |
|                                | 1.3825                                                                                              |                                                                                                       |
|                                | 1.3934                                                                                              |                                                                                                       |
|                                | 1.3989                                                                                              |                                                                                                       |
|                                | 1.3956                                                                                              |                                                                                                       |
|                                | 1.3746                                                                                              |                                                                                                       |
|                                | 1.3892                                                                                              |                                                                                                       |
|                                | 1.3852                                                                                              |                                                                                                       |
|                                | 1.4027                                                                                              |                                                                                                       |
|                                | 1.3852                                                                                              |                                                                                                       |
|                                | 1.3965                                                                                              |                                                                                                       |
|                                | 1.3961                                                                                              |                                                                                                       |
|                                | 1.3731                                                                                              |                                                                                                       |
| <b>AVG</b>                     | <b>1.389591667</b>                                                                                  | <b>1.3971</b>                                                                                         |
| <b>STDEV</b>                   | <b>0.009361234</b>                                                                                  | <b>0.007238544</b>                                                                                    |
| <b>STDEV(%)</b>                | <b>0.673667945</b>                                                                                  | <b>0.518112102</b>                                                                                    |
